# Supplementary material
Source: PubMed Central journal article supplement (PMC6704609)

## SUPPLEMENTAL METHODS

***In vitro* stimulation.** Peritoneal macrophages were cultured on a 24-well plate ( $1 \times 10^5$  cells/well) and treated with PBS, LPS (0.5  $\mu\text{g}/\text{mL}$ , Sigma L8643) or *A. baumannii* EVs (100 ng/mL in total protein concentration), with or without polymyxin B (20 mg/mL), in the medium containing 0.5% fetal bovine serum for 12 h. The cell-free conditioned medium was collected and stored at  $-80^\circ\text{C}$  until the cytokine concentrations were determined.

**Cytokine measurement.** The concentrations of TNF- $\alpha$  were measured in conditioned media by DuoSet ELISA Development kit (R&D Systems, Minneapolis, MN, USA), according to the manufacturer's instructions.

## SUPPLEMENTAL FIGURE LEGEND

**FIG S1.** The roles of LPS in *A. baumannii* EV-mediated release of TNF- $\alpha$  from macrophages. Peritoneal macrophages from wild-type mice were stimulated with PBS, LPS (0.5  $\mu\text{g}/\text{mL}$ ), or *A. baumannii* EVs (100 ng/mL in total protein concentration), with or without polymyxin B (PMB; 20 mg/mL). At 12 h after stimulation, the concentrations of TNF- $\alpha$  in conditioned media were determined. \*\*\*,  $P < 0.001$ .

Supplemental Figure 1

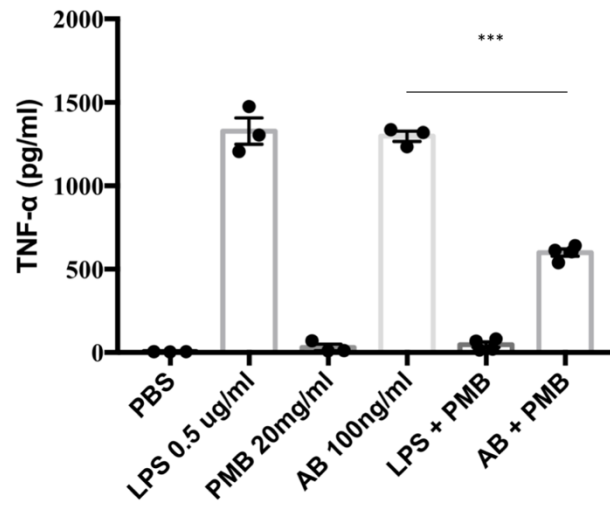

Supplement: IAI.00243-19-s0001.pdf [file IAI.00243-19-s0001.pdf]
